# Supplementary material for: Metal Decoration Effects on the Gas-Sensing Properties of 2D Hybrid-Structures on Flexible Substrates
Source: PubMed Central journal article supplement (PMC4634501; doi:10.3390/s151024903), 2015-09-25
Supplement: sensors-15-24903-s001.pdf [file sensors-15-24903-s001.pdf]

*Supplementary Information*

## **Metal Decoration Effects on the Gas-Sensing Properties of 2D Hybrid-Structures on Flexible Substrates. *Sensors* 2015, 15, 24903-24913**

**Byungjin Cho <sup>1,\*</sup>, Jongwon Yoon <sup>2</sup>, Sung Kwan Lim <sup>3</sup>, Ah Ra Kim <sup>1</sup>, Sun-Young Choi <sup>1</sup>, Dong-Ho Kim <sup>1</sup>, Kyu Hwan Lee <sup>4</sup>, Byoung Hun Lee <sup>2,3</sup>, Heung Cho Ko <sup>2</sup> and Myung Gwan Hahm <sup>1,\*</sup>**

<sup>1</sup> Advanced Functional Thin Films Department, Surface Technology Division, Korea Institute of Materials Science (KIMS), 797 Changwondaero, Sungsan-Gu, Changwon, Gyeongnam 642-831, Korea; E-Mails: kimahra86@kims.re.kr (A.R.K.); tjsdud2995@kims.re.kr (S.-Y.C.); dhkim2@kims.re.kr (D.-H.K.)

<sup>2</sup> School of Materials Science and Engineering, Gwangju Institute of Science and Technology (GIST), 261 Cheomdan-gwagi-ro, Buk-Gu, Gwangju 500-712, Korea; E-Mails: jwyoon@gist.ac.kr (J.Y.); bhl@gist.ac.kr (B.H.L.); heungcho@gist.ac.kr (H.C.K.)

<sup>3</sup> Department of Nanobio Materials and Electronics, Gwangju Institute of Science and Technology (GIST), 261 Cheomdan-gwagi-ro, Buk-Gu, Gwangju 500-712, Korea; E-Mail: lsk8410@gist.ac.kr

<sup>4</sup> Electrochemistry Department, Surface Technology Division, Korea Institute of Materials Science (KIMS), 797 Changwondaero, Sungsan-Gu, Changwon, Gyeongnam 642-831, Korea; E-Mail: lgh1636@kims.re.kr

\* Authors to whom correspondence should be addressed; E-Mails: bjcho@kims.re.kr (B.C.); mghahm@kims.re.kr (M.G.H.); Tel.: +82-55-280-3631 (B.C.); +82-55-280-3633 (M.G.H.)

---

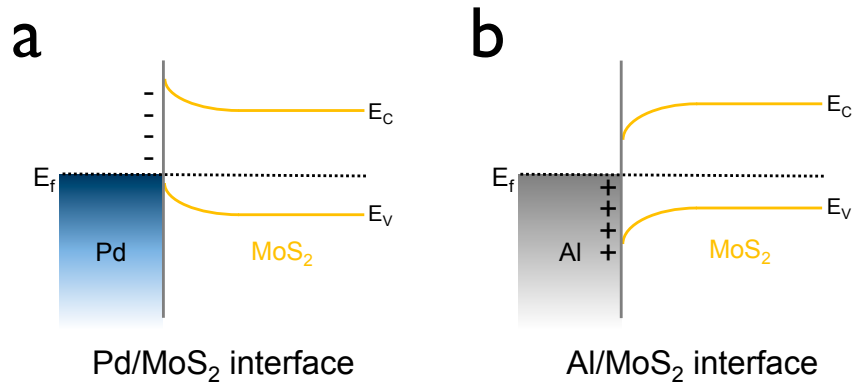

**Figure S1.** Diagrams of the band-bending on (a) Pd/MoS<sub>2</sub> and (b) Al/MoS<sub>2</sub> interfaces. The  $E_f$  is Fermi level of Pd and MoS<sub>2</sub> aligned after junction formation. The  $E_c$  and  $E_v$  are the conductance and valance band edges of MoS<sub>2</sub>, respectively.

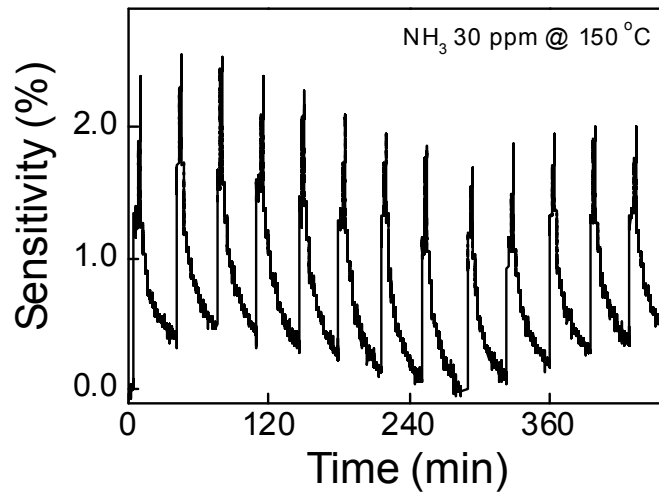

**Figure S2.** Cyclic gas-sensing performance of flexible Pd:MoS<sub>2</sub> gas-sensing device under NH<sub>3</sub> 30 ppm, showing a highly reproducible sensing behavior.
